# Supplementary material for: A hydrostable Zn2+ coordination polymer for multifunctional detection of inorganic and organic contaminants in water
Source: Royal Society of Chemistry journal article supplement (doi:10.1039/d1dt03022a), 2021-01-01
Supplement: d1dt03022a1.pdf [file d1dt03022a1.pdf]

## Supporting Information

### **A hydrostable Zn<sup>2+</sup> Coordination Polymer for Multifunction Detection of Inorganic and Organic Contaminants in Water**

*Hao Cheng, Fu-Qiang Song, Na-Na Zhao, Xue-Qin Song\**

a. School of Chemistry and Chemical Engineering, Lanzhou Jiaotong University,  
Lanzhou, 730070, China.

## Contents

|                                                                                                                                                                                                                                                       |     |
|-------------------------------------------------------------------------------------------------------------------------------------------------------------------------------------------------------------------------------------------------------|-----|
| Materials and Physical Measurements -----                                                                                                                                                                                                             | S2  |
| Details of Single Crystal X-ray Diffraction -----                                                                                                                                                                                                     | S2  |
| Synthesis -----                                                                                                                                                                                                                                       | S3  |
| Chemical and Water Stability Experiment -----                                                                                                                                                                                                         | S3  |
| Details of DFT calculation-----                                                                                                                                                                                                                       | S3  |
| <b>Table S1</b> Crystal data and structure refinement parameters for <b>ZnCP</b> -----                                                                                                                                                                | S4  |
| <b>Table S2</b> Shape calculation results of $\text{Zn}^{2+}$ in <b>ZnCP</b> -----                                                                                                                                                                    | S4  |
| <b>Table S3</b> Important bond lengths and angels for <b>ZnCP</b> -----                                                                                                                                                                               | S4  |
| <b>Table S4.</b> H-bond parameters in <b>ZnCP</b> . -----                                                                                                                                                                                             | S4  |
| <b>Fig. S1</b> IR spectra of $\text{H}_4\text{L}$ and <b>ZnCP</b> . -----                                                                                                                                                                             | S5  |
| <b>Fig. S2</b> PXRD patterns of <b>ZnCP</b> after treated by aqueous solutions with various pH values from 3 to 12, after storage in water for 14 days, after frozen at $-20^\circ\text{C}$ and heated at $50^\circ\text{C}$ in water for 1 day. ---- | S5  |
| <b>Fig. S3</b> TGA curves of <b>ZnCP</b> under $\text{N}_2$ atmosphere from 30 to $740^\circ\text{C}$ . -----                                                                                                                                         | S6  |
| <b>Fig. S4</b> Coordination polyhedron around $\text{Zn}^{2+}$ ion in <b>ZnCP</b> . -----                                                                                                                                                             | S6  |
| <b>Fig. S5</b> The relative emission intensity of <b>ZnCP</b> at 441 nm in aqueous solutions with different pH values (3-12) and different temperatures. -----                                                                                        | S7  |
| <b>Fig. S6</b> Contour plots of the frontier orbitals of $\text{H}_4\text{L}$ and <b>ZnCP</b> . -----                                                                                                                                                 | S7  |
| <b>Fig. S7</b> The simulated fluorescence spectrum $\text{H}_4\text{L}$ and <b>ZnCP</b> based on TD-DFT calculations. -----                                                                                                                           | S8  |
| <b>Fig. S8</b> PXRD patterns of <b>ZnCP</b> after immersed in $\text{Fe}^{3+}$ and PA aqueous solutions. -----                                                                                                                                        | S8  |
| <b>Fig. S9</b> FTIR spectra of <b>ZnCP</b> and <b>ZnCP@Fe<sup>3+</sup></b> .-----                                                                                                                                                                     | S8  |
| <b>Fig. S10</b> Emission spectra of the water suspension of $\text{H}_4\text{L}$ upon addition of 50 $\mu\text{M}$ of different metal cations. -----                                                                                                  | S9  |
| <b>Fig. S11</b> Pictorial representation of the excited state electron transfer from the LUMO-HOMO. -----                                                                                                                                             | S9  |
| <b>Fig. S12</b> The graphical representation showing the proposed hydrogen bonding between of PA and <b>ZnCP</b> . -----                                                                                                                              | S10 |
| <b>Fig. S13</b> The emission spectra of <b>ZnCP</b> suspensions at different concentrations of PA. -----                                                                                                                                              | S10 |
| <b>Fig. S14</b> The relative fluorescence intensity with the increase of concentration of <b>ZnCP</b> in PMMA. --                                                                                                                                     | S11 |
| <b>Fig. S15</b> IR spectra of <b>ZnCP@PMMA</b> . -----                                                                                                                                                                                                | S11 |
| <b>Fig. S16</b> Excitation and emission spectra of PMMA. -----                                                                                                                                                                                        | S11 |
| <b>Fig. S17</b> The competition experiments of <b>ZnCP@PMMA</b> + PA in the presence of other nitroaromatics.-----                                                                                                                                    | S12 |
| <b>References</b> -----                                                                                                                                                                                                                               | S12 |

## Materials and Physical Measurements

All the reagents and  $\text{Zn}(\text{NO}_3)_2 \cdot 6\text{H}_2\text{O}$  used were purchased from Aladdin Reagent (Shanghai)Co., Ltd. without further purification.

The relevant data of the elemental analysis described in this article was obtained through the Thermo Flash 2000 elemental analyzer. The infrared spectrum was measured on a Thermo Mattson FTIR spectrometer, and the wavenumber range was  $4000\sim 400\text{ cm}^{-1}$ . The powder X-ray diffraction (PXRD) patterns were determined on an X-ray diffractometer (Rigaku D/Max 2200PC) in the  $2\theta$  range of  $5^\circ\sim 50^\circ$ . The thermal analysis is performed from  $30^\circ\text{C}$  to  $800^\circ\text{C}$  at a heating rate of  $10^\circ\text{C min}^{-1}$  under  $\text{N}_2$  atmosphere on a TGA/NETZSCH STA449C instrument. Mercury program version 3.10 was used to simulate the PXRD mode of  $\text{Zn}^{2+}$  complexes. F-7000 fluorescence spectrophotometer was used to obtain the luminescence of the solid powder and the suspension, and the wavelength range was  $300\sim 700\text{ nm}$ .

## Crystallographic Data Collection and Refinement.

Single crystals of **ZnCP** with approximate dimensions of  $0.35\times 0.30\times 0.10\text{ mm}^3$  which were suitable for X-ray diffraction were obtained in moderate yield by solvothermal method. Crystal data of **ZnCP** was collected on a Bruker APEX-II CCD diffractometer ( $\text{MoK}\alpha$  radiation,  $\lambda = 0.71073\text{ \AA}$ ) at  $100\text{ K}$ . Structure was solved by direct methods and refined by a full matrix least-squares technique based on  $F^2$  using the SHELXL 2014 program.<sup>1</sup> In addition, the disordered crystalline water and DMF molecules in **ZnCP** are difficult to identify, correspondingly, solvate molecules were accounted for by using the program PLATON/SQUEEZE (Spek, 2009) in order to remove the contributions of disordered solvent.<sup>2</sup> For details about the squeezed material, see cif data in Supporting Information. Therefore, free water and DMF molecules which were determined on the basis of TGA and elemental microanalysis, and the data treated with the SQUEEZE routine within PLATON were added to the molecular formula of **ZnCP** respectively. Drawings of the molecules were performed with the program Diamond.<sup>3</sup> Crystallographic data as well as details of data collection and refinement for **ZnCP** is summarized in Table S1, important bond lengths are listed in Table S3. CCDC 2106760

contain the supplementary crystallographic data of **Zn-CP**, which can be obtained from the authors or the Cambridge Crystallographic Data Centre via [www.ccdc.cam.ac.uk/data\\_request / cif](http://www.ccdc.cam.ac.uk/data_request/cif).

## Synthesis

The general procedure for preparation of **ZnCP**: A mixture of H<sub>4</sub>L (0.01 mmol, 4.1 mg), Zn(NO<sub>3</sub>)<sub>2</sub>·6H<sub>2</sub>O (0.01 mmol), 6mL DMF, 2 mL H<sub>2</sub>O was heated at 150 °C for 3 days in a 10 mL Teflon-lined stainless steel, and then cooled at a rate of 6°C·h<sup>-1</sup> to room temperature. Colorless rhomboid single crystals were collected by filtration, washed with water for three times. Test samples except that for single crystal analysis were obtained from repeated experiments.<sup>4, 5</sup>

## Chemical and Water Stability Experiment

The PXRD experiments and the fluorescence determination were performed to verify the chemical and water stability by soaking **ZnCP** in deionized water for two weeks, in aqueous solutions of different pH values (3~12) for 3 days, heated in water at 50°C and frozen in water at -20°C for 1 day respectively.

## Details of DFT calculation

Geometry optimization and the time dependent density functional theory (TD-DFT) calculations of H<sub>4</sub>L in a vacuum was carried out using the B3LYP hybrid function at the 6-31G (d, p) level and that for **ZnCP** was done by using the B3LYP hybrid function at the LANL2DZ level for Zn and 6-31G (d, p) level for C, H and O.<sup>6</sup> Visualization was done using GaussView 5.0.<sup>7-9</sup>

**Table S1.** Crystal data and structure refinement parameters for **ZnCP**.

|                                              |                                                                   |
|----------------------------------------------|-------------------------------------------------------------------|
| Compound                                     | <b>ZnCP</b>                                                       |
| Empirical formula                            | C <sub>29</sub> H <sub>30</sub> N <sub>4</sub> O <sub>13</sub> Zn |
| Temperature (K)                              | 100(2)                                                            |
| Formula weight                               | 706.11                                                            |
| Diffraction                                  | Mo K $\alpha$ (0.71073 Å)                                         |
| Crystal system                               | Monoclinic                                                        |
| Space group                                  | P2 <sub>1</sub> /c                                                |
|                                              | $a = 11.0213(5)\text{Å}; \alpha=90^\circ$                         |
| Unit cell dimensions                         | $b = 17.0939(8)\text{Å}; \beta=107.13(10)^\circ$                  |
|                                              | $c = 15.5201(7)\text{Å}; \gamma=90^\circ$                         |
| $V/\text{Å}^3, Z$                            | 2794.2(2), 4                                                      |
| $D_{\text{calcd}}/\text{Mg m}^{-3}$          | 1.116                                                             |
| $\mu/\text{mm}^{-1}, F(000)$                 | 0.915, 944                                                        |
| $\theta$ range for data collection           | 2.271°~24.999°                                                    |
| index ranges, $hkl$                          | $-13 \leq h \leq 13; -20 \leq k \leq 20; -17 \leq l \leq 18$      |
| Independent reflections ( $R_{\text{int}}$ ) | 0.0887                                                            |
| Completeness                                 | 99.8%                                                             |
| Reflections unique / collected               | 4907 / 32630                                                      |
| Data / restraints / params                   | 4907 / 2 / 280                                                    |
| Goodness-of-fit on $F^2$                     | 1.147                                                             |
| Final $R$ indices [ $I > 2\sigma(I)$ ]       | $R_1 = 0.0541, wR_2 = 0.1323$                                     |
| $R$ indices (all data)                       | $R_1 = 0.0628, wR_2 = 0.1353$                                     |

**Table S2.** Shape calculation results of Zn<sup>2+</sup> in **ZnCP**.

|                                        |        |
|----------------------------------------|--------|
| Hexagon (HP-6)                         | 0.2740 |
| Pentagonal pyramid (PPY-6)             | 0.2261 |
| Octahedron (OC-6)                      | 0.0954 |
| Trigonal prism (TPR-6)                 | 0.1101 |
| Johnson pentagonal pyramid J2 (JPPY-6) | 0.2499 |

**Table S3.** Selected bond lengths (Å) and angles (°) for **ZnCP**.

|           |            |           |            |           |            |        |          |
|-----------|------------|-----------|------------|-----------|------------|--------|----------|
| Zn1–O2    | 2.154(3)   | Zn1–O3    | 2.213(3)   | Zn1–O6    | 2.211(3)   | Zn1–O7 | 2.177(3) |
| Zn1–N1    | 2.014(3)   | Zn1–N2    | 2.019(3)   |           |            |        |          |
| O2–Zn1–O3 | 153.13(10) | O2–Zn1–O6 | 96.09(12)  | O2–Zn1–O7 | 92.35(12)  |        |          |
| O6–Zn1–O3 | 90.13(11)  | O7–Zn1–O3 | 94.06(11)  | O7–Zn1–O6 | 152.49(10) |        |          |
| N1–Zn1–O2 | 77.50(12)  | N1–Zn1–O3 | 75.78(12)  | N1–Zn1–O6 | 97.42(12)  |        |          |
| N1–Zn1–O7 | 109.97(12) | N1–Zn1–N2 | 171.36(13) | N2–Zn1–O2 | 108.59(12) |        |          |
| N2–Zn1–O3 | 98.28(12)  | N2–Zn1–O6 | 76.10(12)  | N2–Zn1–O7 | 76.39(12)  |        |          |

**Table S4.** The H-bond parameters in **ZnCP**

| D–H $\cdots$ A      | $d(\text{D–H})$ | $d(\text{H}\cdots\text{A})$ | $d(\text{D}\cdots\text{A})$ | D–H $\cdots$ A |
|---------------------|-----------------|-----------------------------|-----------------------------|----------------|
| C10–H10 $\cdots$ O3 | 0.0950(4)       | 2.4311(2)                   | 3.2583(50)                  | 145.443(287) ° |
| C10–H10 $\cdots$ O7 | 0.0950(4)       | 2.6924(9)                   | 3.4408(52)                  | 136.133(296) ° |
| C12–H12 $\cdots$ O1 | 0.9507(45)      | 2.6693(12)                  | 3.3118(55)                  | 125.383(294) ° |
| C13–H13 $\cdots$ O2 | 0.9501(40)      | 2.7381(8)                   | 3.5482(50)                  | 143.628(287) ° |
| C13–H13 $\cdots$ O6 | 0.9501(40)      | 2.6146(11)                  | 3.3785(51)                  | 137.717(287) ° |

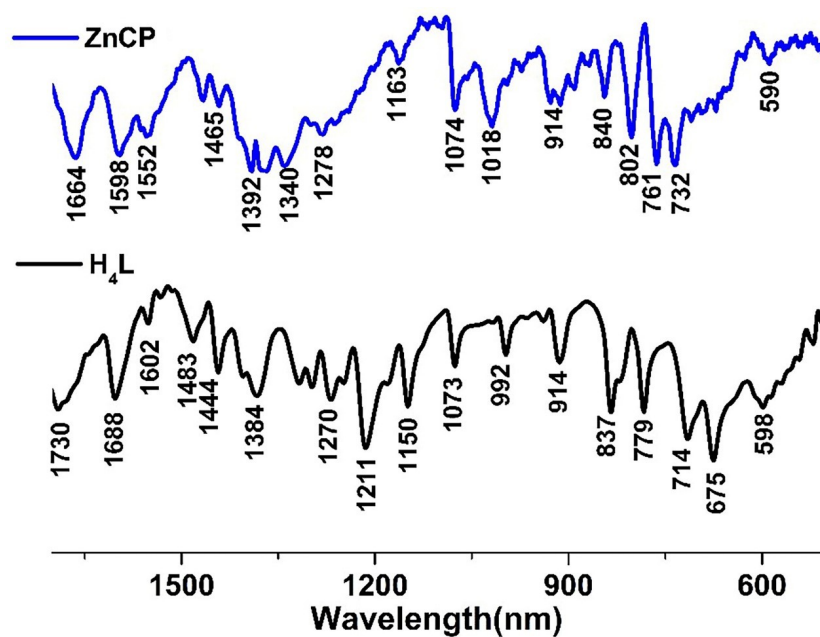

Fig. S1 IR spectra of H<sub>4</sub>L, ZnCP in solid state with KBr discs.

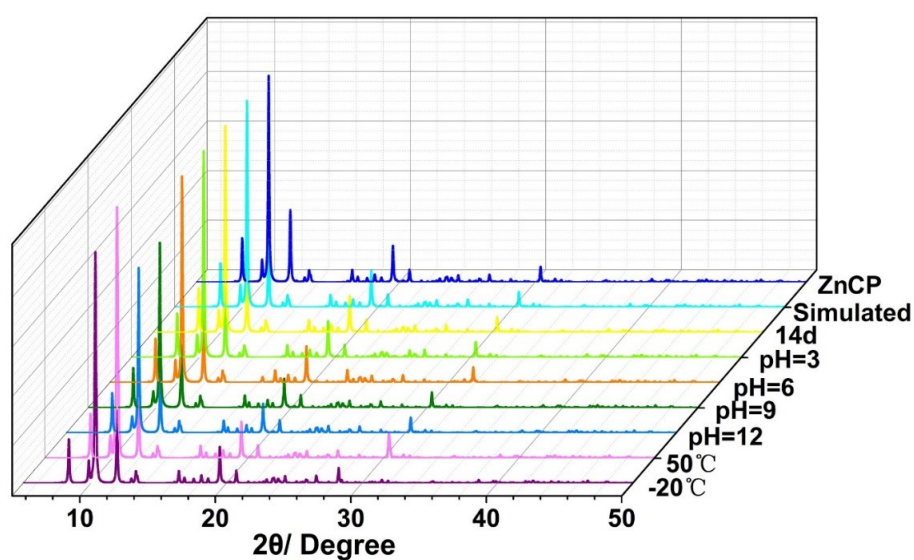

Fig. S2 PXRD patterns of ZnCP and that upon treated by aqueous solutions with pH values ranging from 3 to 12, after storage in water for 14 days, after frozen at -20°C and heated at 50°C in for 1 day.

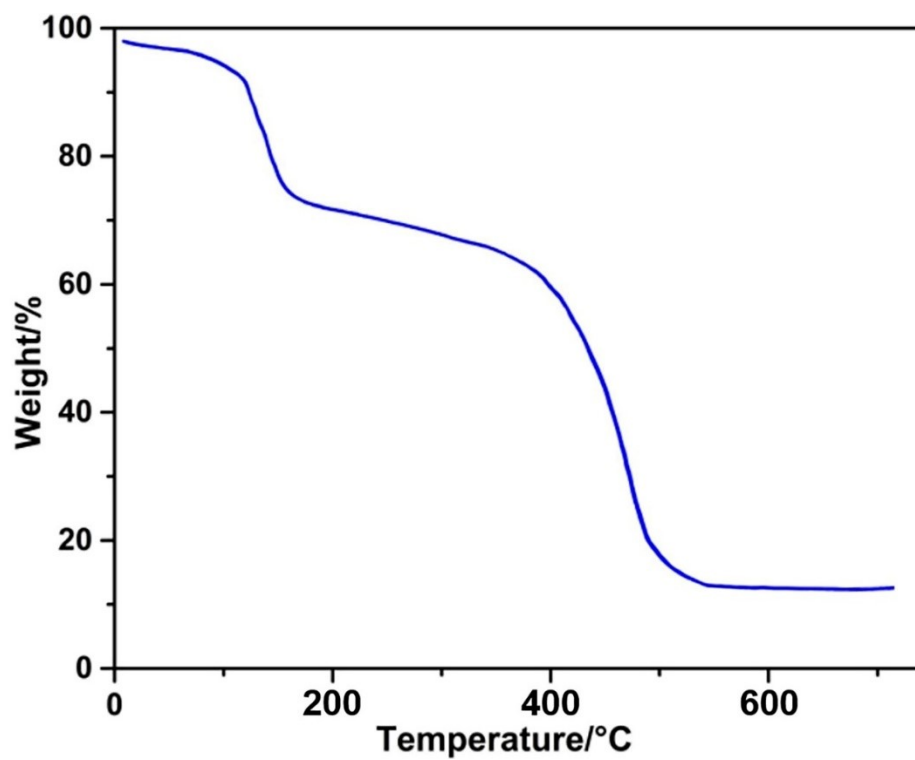

Fig. S3 TGA curves of **ZnCP** under  $\text{N}_2$  atmosphere from 30 to 740 °C.

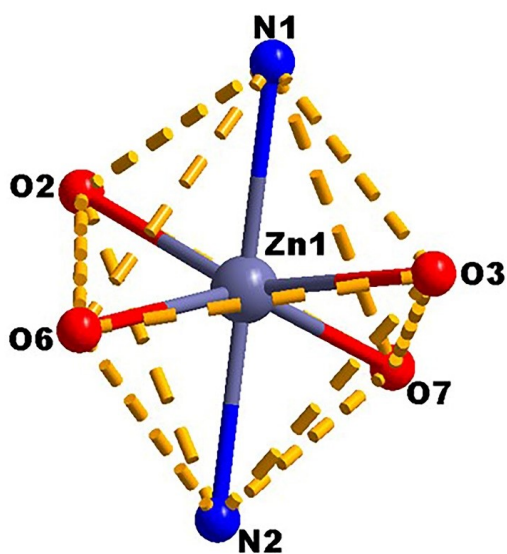

Fig. S4 The Coordination polyhedron of  $\text{Zn}^{2+}$  ion in **ZnCP**.

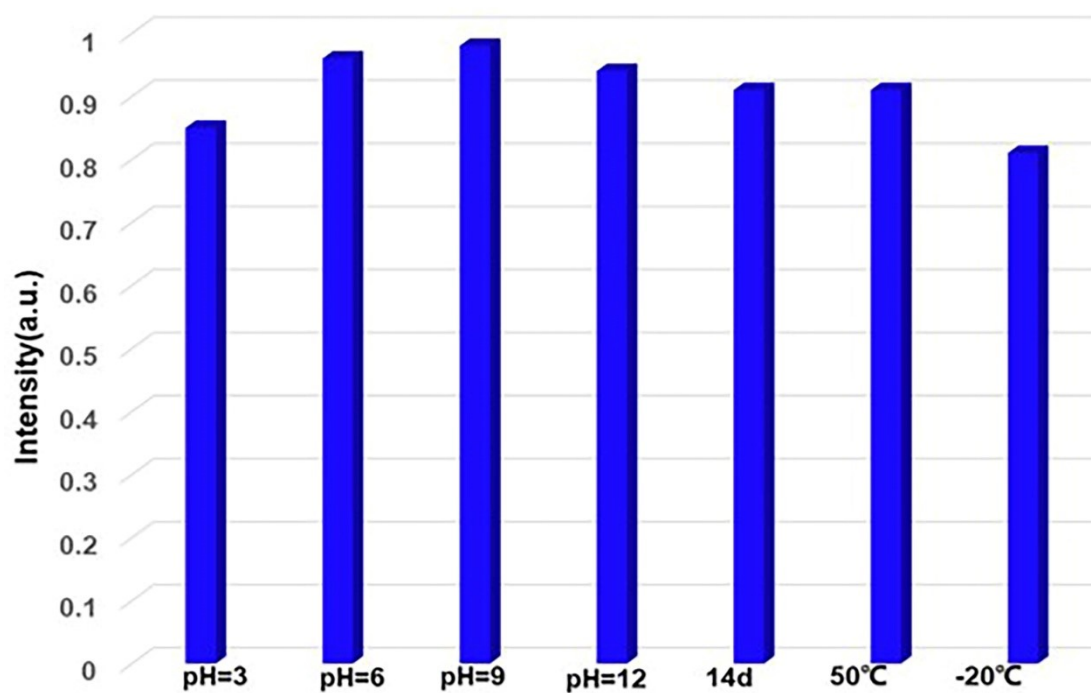

**Fig. S5** The relative emission intensity of **ZnCP** at 441 nm upon treated with aqueous solutions with different pH values (3-12) and different temperatures.

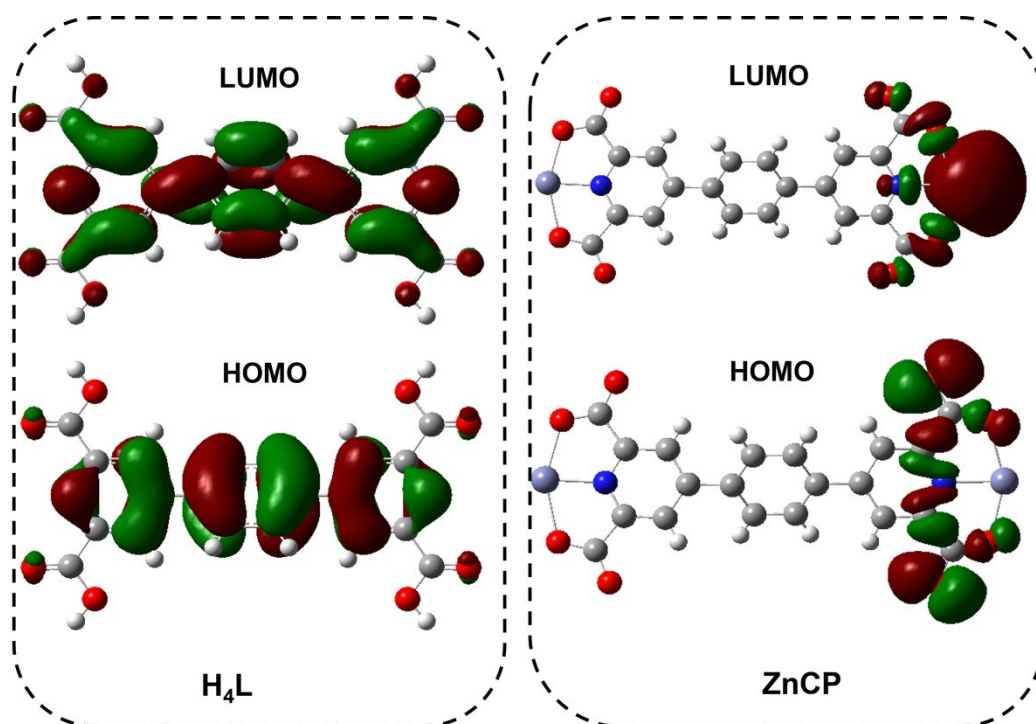

**Fig. S6** Contour plots of the frontier orbitals of **H<sub>4</sub>L** and **ZnCP**.

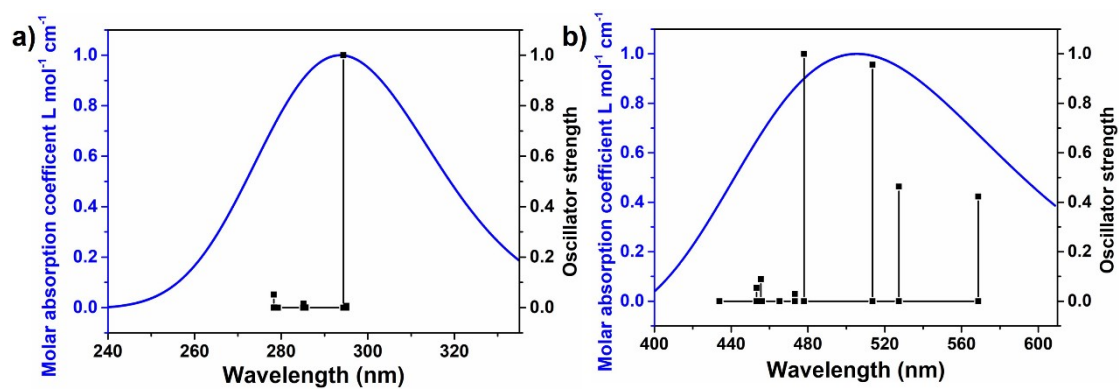

Fig. S7 The simulated fluorescence spectrum H<sub>4</sub>L and ZnCP based on TD-DFT calculations.

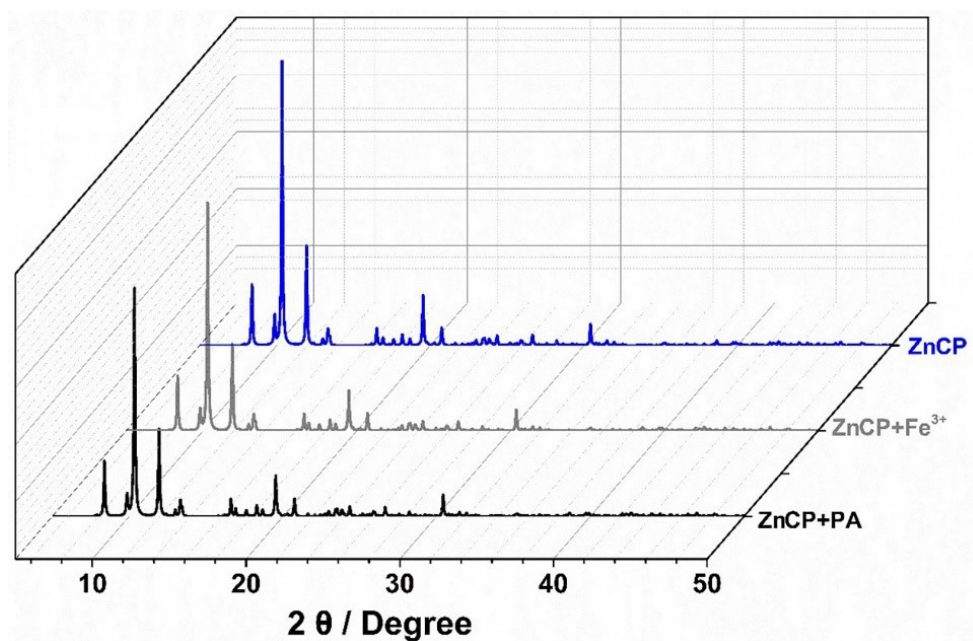

Fig. S8 PXRD patterns of ZnCP after immersed in PA aqueous solutions.

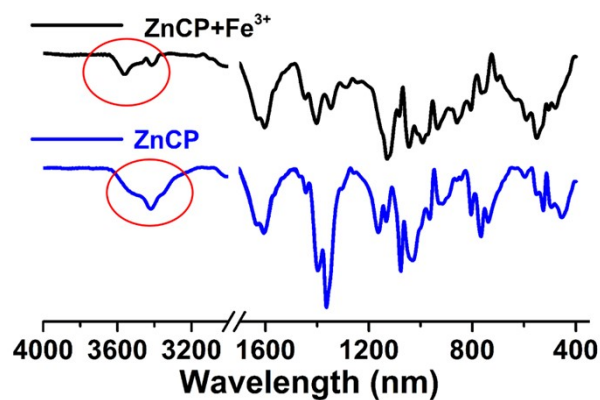

Fig. S9 FT-IR spectra of ZnCP and ZnCP@Fe<sup>3+</sup>.

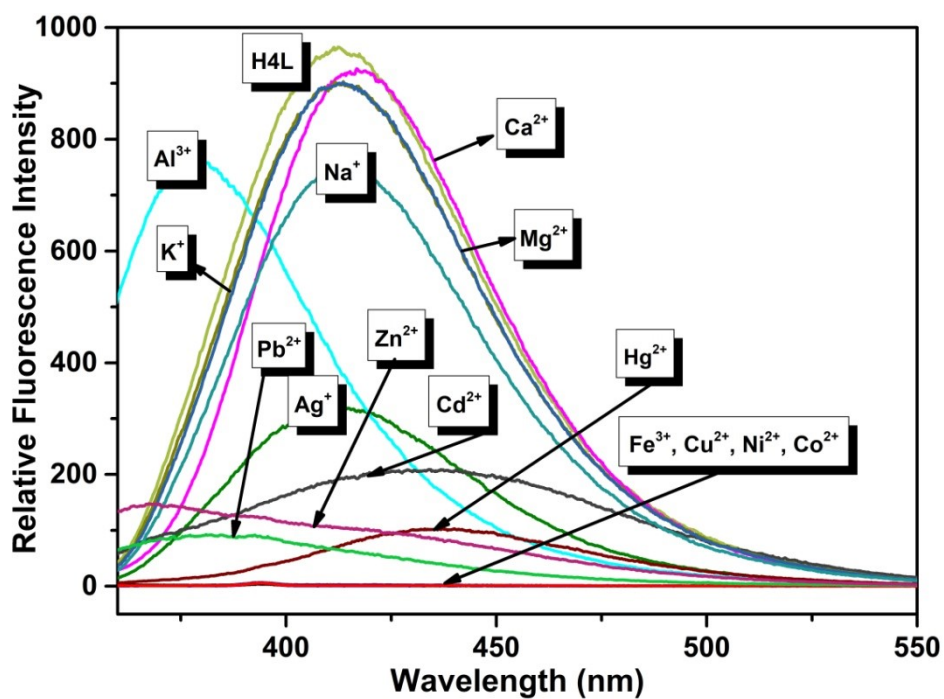

**Fig. S10** Emission spectra of the water suspension of H<sub>4</sub>L upon addition of 50  $\mu$ M of different metal cations.

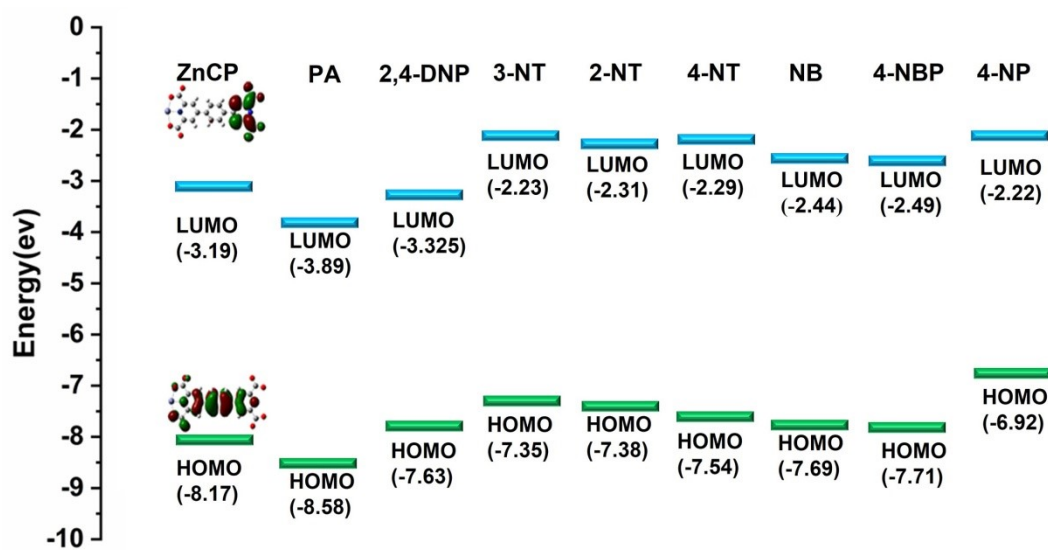

**Fig. S11** Pictorial representation of the excited state electron transfer from the LUMO-HOMO.

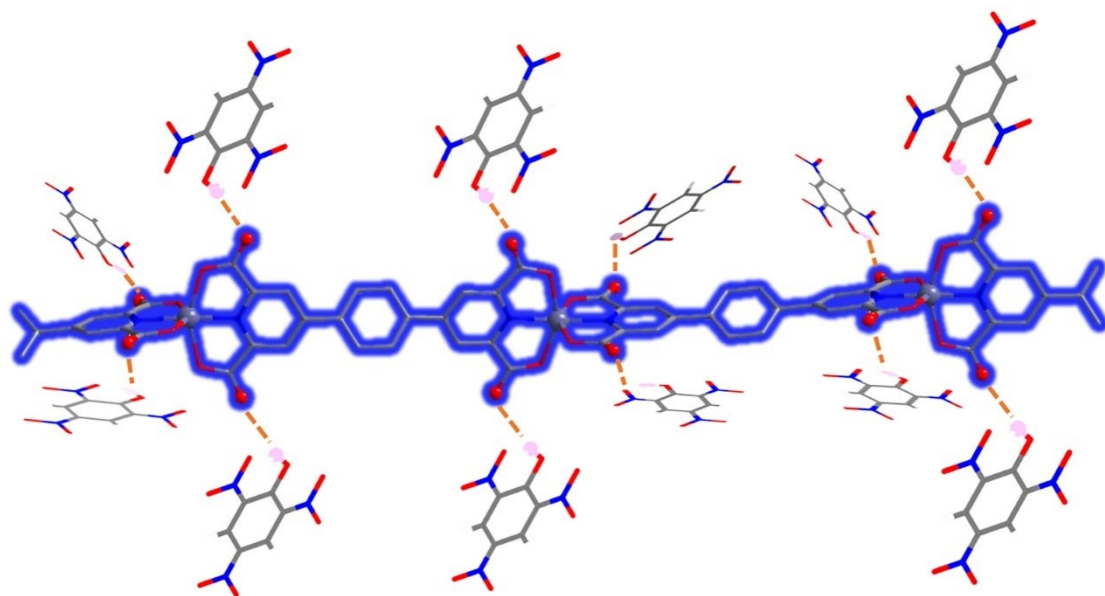

**Fig. S12** The graphical representation showing proposed hydrogen bonding between of PA and ZnCP.

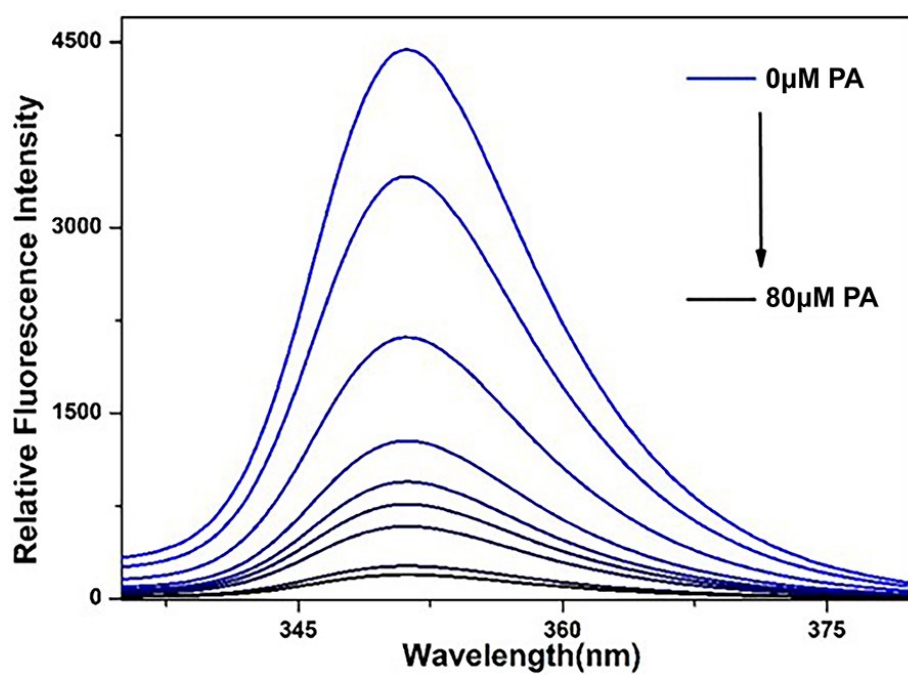

**Fig. S13** The emission spectra of ZnCP suspensions at different concentrations of PA.

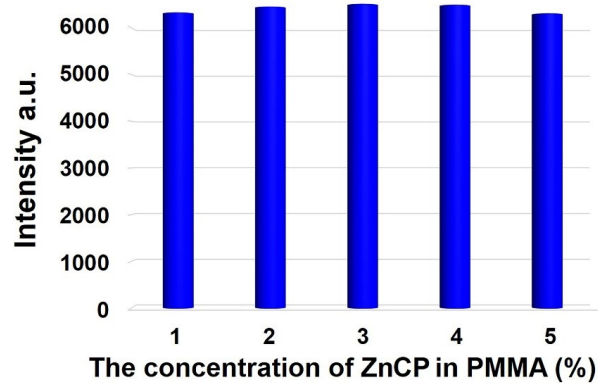

**Fig. S14** The relative fluorescence intensity with the increase of concentration of **ZnCP** in PMMA.

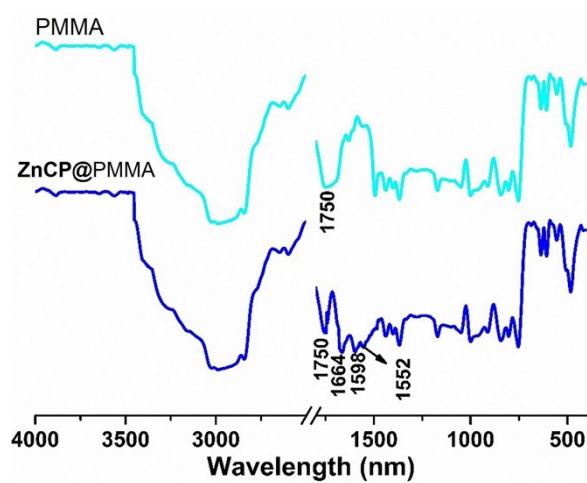

**Fig. S15** IR spectra of **ZnCP@PMMA**.

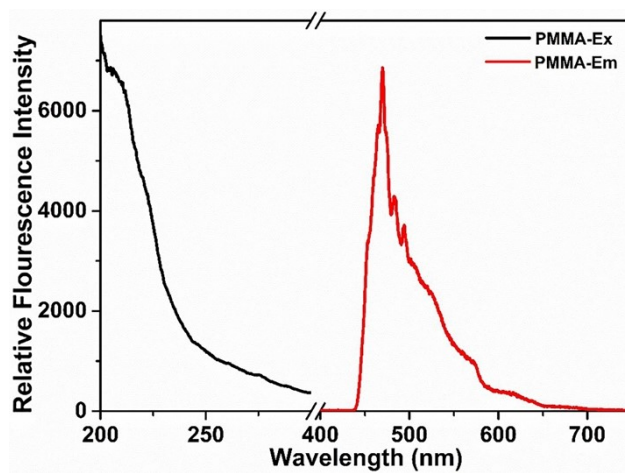

**Fig. S16** Excitation and emission spectra of PMMA.

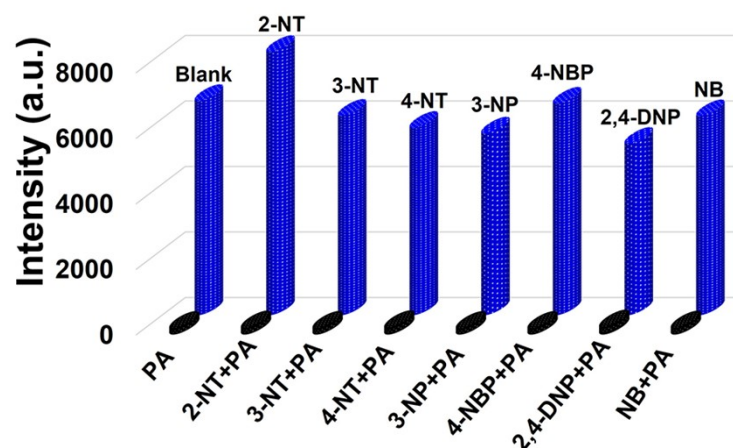

**Fig. S17** The competition experiments of **ZnCP@PMMA + PA** in the presence of other nitroaromatics.

## Reference

1. G. M. Sheldrick, SHELXTL, Reference Manual: version 5.1: Bruker AXS, Madison, WI, 2014.
2. A. L. Spek, J. Appl. Crystallogr, 2003, 36, 7.
3. DIAMOND. version 3.1; Crystal Impact: Bonn, Germany, 2004.
4. Z. -G. Lin, F. -Q. Song, H. Wang, X. -Q. Song, X. -X. Yu, W. -s. Liu, *Dalton Trans.* 2021, **50**, 1874-1886.
5. K. Fan, F. Li, L. Wang, Q. Daniel, E. Gabrielsson and L. Sun, *Phys. Chem. Chem. Phys.* 2014, 16, 25234–25241.
6. M. J. Frisch, et al., Gaussian 09, Revision A.02, Gaussian, Inc., Wallingford CT, 2009.
7. R. Dennington, T. A. Keith and J. M. Millam, GaussView, Version 5, Semichem Inc., Shawnee Mission, KS, 2009;
8. T. Lu, F. Chen, *J. Comput. Chem.* 2012, **33**, 580–592.
9. H. -H. Meng, C. -Y. Wang, W. Xi, X. -Q. Song, L. Wang, *Dalton Trans.* 2019, **48**, 12326–12335.
